# Supplementary material
Source: PubMed Central journal article supplement (PMC4583808)

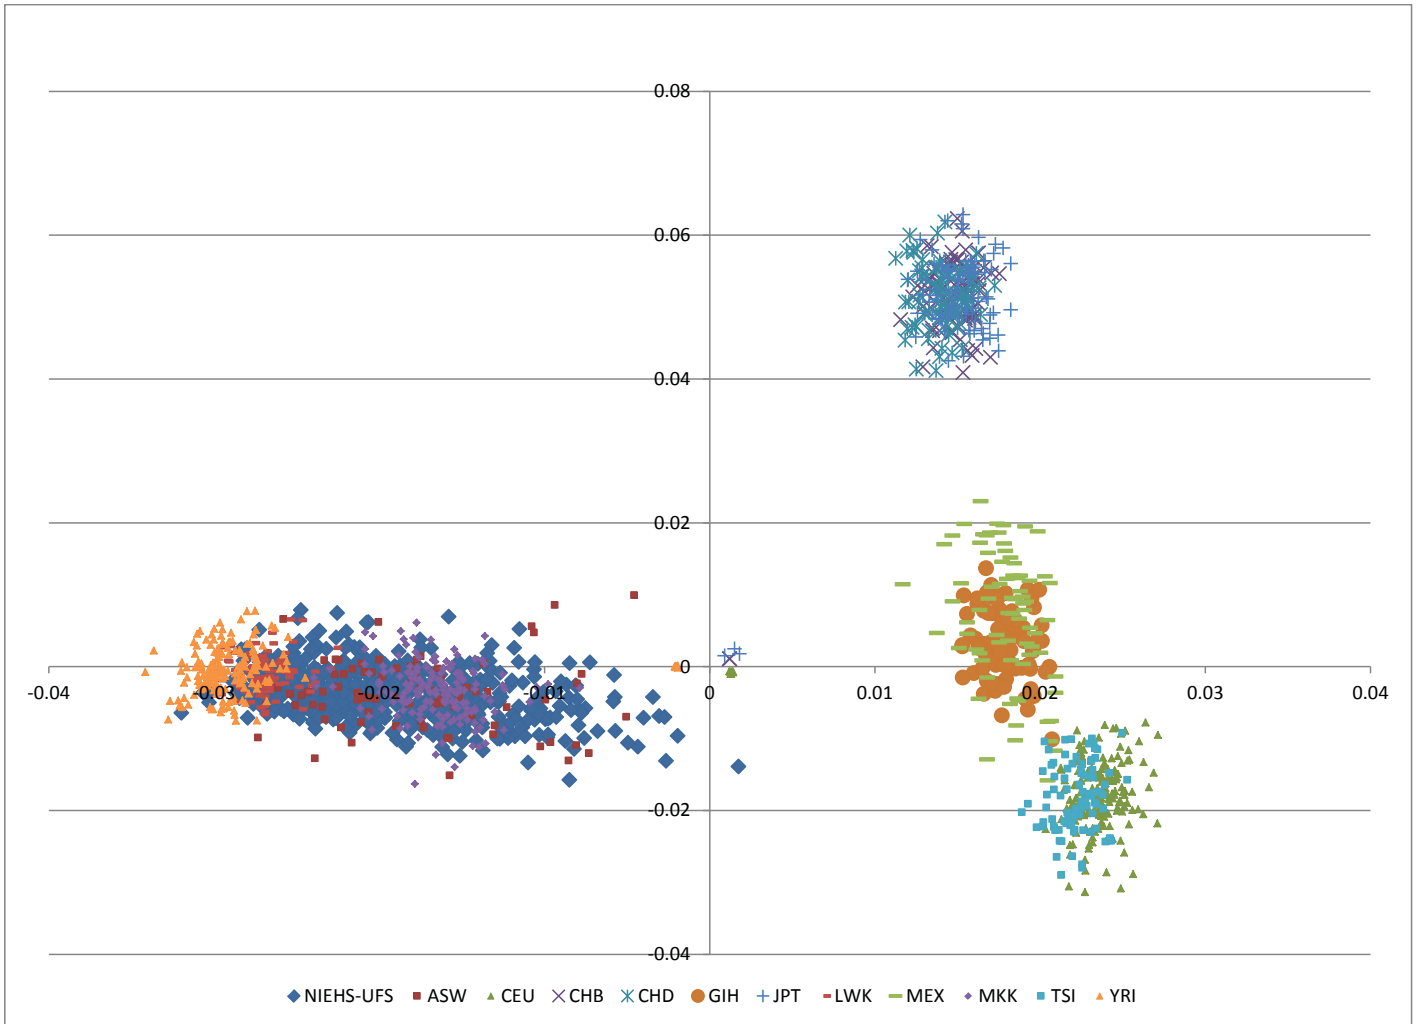

Supplement: NIHMS688544-supplement-4.pdf [file NIHMS688544-supplement-4.pdf]
